# Supplementary material for: MicroRNA-381 Regulates Proliferation and Differentiation of Caprine Skeletal Muscle Satellite Cells by Targeting PTEN and JAG2
Source: MDPI journal article supplement (doi:10.3390/ijms232113587), 2022-11-05
Supplement: s1 [file s1]

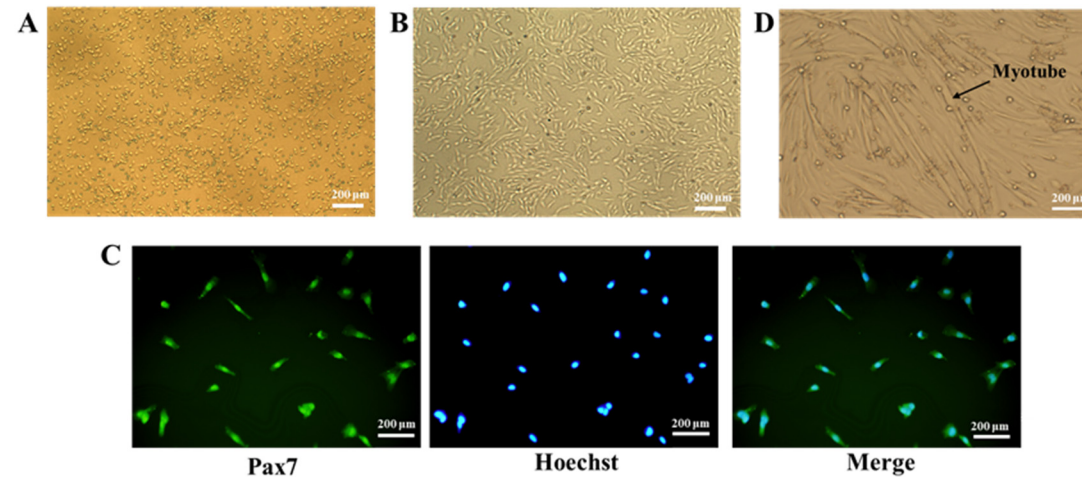

**Figure S1.** Isolation, identification and myogenic differentiation of caprine skeletal muscle satellite cells (SMSCs). The morphology of isolated SMSCs cultured in growth medium for 48 h (A) and 96 h (B). (C) Identification of isolated SMSCs using immunofluorescence staining of Pax7. (D) SMSCs were differentiated into myotubes on day 6 after differentiation initiation.

**Table S1.** List of the primers used in this study.

| miRNA/gene                    | Forward (5' to 3')                           | Reverse (5' to 3')                             |
|-------------------------------|----------------------------------------------|------------------------------------------------|
| miR-381                       | TATACAAGGGCAAGCTCTCTGT                       | mRQ 3' primer <sup>1</sup>                     |
| <i>U6</i>                     | GGAACGATACAGAGAAGATTAGC                      | TGGAACGCTTCACGAATTTGCG                         |
| <i>ACTB</i>                   | AGCCTTCCTTCCTGGGCATGGA                       | GGACAGCACCGTGTTGGCGTAA                         |
| <i>Myf5</i>                   | CACAACCAACCCTAACCA                           | TTGATCCGATCCACTATG                             |
| <i>TUBB</i>                   | AGCGTATCTCAGAGCAGTTC                         | AATCCTCTTCCTCTTCTGCG                           |
| <i>CCND1</i>                  | CGTCCATGCGGAAGATCGT                          | ACAGGAAGCGGTCCAGGTAGT                          |
| <i>CDKN1C</i>                 | CAGCCAGAGCATTGGCAATG                         | CTGTCCACCTCGGTCCACT                            |
| <i>MyoG</i>                   | CGTGGGCGTGTAAGGTGT                           | GGCGCTCTATGTACTGGATGG                          |
| <i>MyHC</i>                   | CCACATCTTCTCCATCTCTG                         | GGTTCCTCCTTCTTCTTCTC                           |
| <i>MEF2C</i>                  | ATCCTGATGCAGACGATTGAG                        | GGTGGAACAGCACACAATCTT                          |
| <i>PTEN-wild</i> <sup>2</sup> | CCGCTCGAGTGAGATGAAAGAGACTGATTTCC             | AAATATGCGGCCGCTGGAAAGGGCTCTTCAGTACA            |
| <i>PTEN-mut</i> <sup>3</sup>  | GTTGAACATAATTCATGTATATATTTCTTTAAATGGTGA<br>A | CATGAATTATGTTCAACAAAAACAGGATTGTATAGTCACT<br>GA |
| <i>PTEN-CDS</i> <sup>4</sup>  | CGACGGGAAGACAAGTTCAT                         | AGGTTTCCTCTGGTCCTGGT                           |
| <i>JAG2-wild</i> <sup>5</sup> | CCGCTCGAGGCCCGGGCGGCCGGCCCGCT                | AAATATGCGGCCGCACCACAGGAGCCCCCGGCAGC            |
| <i>JAG2-mut</i> <sup>6</sup>  | CTGTAGCGAACATAAATTATTCGGTAACTGTCAGGCG        | ATTTATGTTGCTACAGAAACGTAGAAAATAAACATTTG         |
| <i>JAG2-CDS</i> <sup>7</sup>  | CGCCAATGAGTGTGAAGGGA                         | TCGTTGGCGTTGATGTGGC                            |

<sup>1</sup> A universal down-stream primer used for RT-qPCR analysis of miRNA.

<sup>2,5</sup> Primers used to amplify 3'UTR sequence of *PTNE* and *JAG2* in wild-type vectors constructed, respectively.

<sup>3,6</sup> Primers used to amplify complementarily mutant sequence to 3'UTR sequence of *PTNE* and *JAG2* in mutant-type vectors constructed, respectively.

<sup>4,7</sup> Primers used to amplify the coding sequence of *PTNE* and *JAG2*, respectively.
